# Supplementary material for: Cocrystallization of lenvatinib and temozolomide to improve the performance in terms of stability, dissolution, and tabletability
Source: Royal Society of Chemistry journal article supplement (doi:10.1039/d3ce00473b), 2023-01-01
Supplement: d3ce00473b1.pdf [file d3ce00473b1.pdf]

Supplementary data for

**Cocrystallization of lenvatinib and temozolomide  
to improve the performance in stability,  
dissolution, and tabletability**

**Zhi-Qing Wang, Xia-Lin Dai, Dai-Lin Gu, Chao Wu, Tong-Bu Lu,  
Xiang-Tian Long, Jia-Mei Chen**

**Table S1.** All bond distances and bond angles for **TMZ-LEN·MeOH**

| bond    | bond distance (Å) | bond    | bond distance (Å) |
|---------|-------------------|---------|-------------------|
| C11–C7  | 1.737(2)          | N5–C22  | 1.323(3)          |
| O4–C18  | 1.361(2)          | N4–C20  | 1.316(3)          |
| O4–C21  | 1.439(3)          | C15–C14 | 1.413(3)          |
| O2–C13  | 1.365(3)          | C15–C16 | 1.413(3)          |
| O2–C10  | 1.405(3)          | C14–C17 | 1.409(3)          |
| O6–C26  | 1.206(3)          | C14–C13 | 1.420(3)          |
| O3–C20  | 1.235(3)          | C5–C7   | 1.388(3)          |
| O1–C4   | 1.230(3)          | C5–C6   | 1.390(3)          |
| N7–C24  | 1.392(3)          | C17–C19 | 1.375(3)          |
| N7–C26  | 1.394(3)          | C19–C18 | 1.432(3)          |
| N7–C25  | 1.361(3)          | C19–C20 | 1.504(3)          |
| N8–N9   | 1.274(2)          | C24–C23 | 1.373(3)          |
| N8–C24  | 1.369(3)          | C18–C16 | 1.366(3)          |
| N10–N9  | 1.385(3)          | C13–C11 | 1.370(3)          |
| N10–C26 | 1.366(3)          | C23–C22 | 1.481(3)          |
| N10–C27 | 1.462(3)          | C7–C9   | 1.390(3)          |
| O5–C22  | 1.225(3)          | C9–C10  | 1.382(3)          |
| N2–C5   | 1.403(3)          | C11–C12 | 1.392(3)          |
| N2–C4   | 1.373(3)          | C10–C8  | 1.368(4)          |
| N3–C15  | 1.364(3)          | C6–C8   | 1.379(3)          |
| N3–C12  | 1.319(3)          | C3–C1A  | 1.492(7)          |
| N6–C23  | 1.374(3)          | C3–C2A  | 1.490(7)          |
| N6–C25  | 1.315(3)          | C3–C2B  | 1.486(6)          |
| O7–C28  | 1.397(4)          | C3–C1B  | 1.489(5)          |
| N1–C4   | 1.350(3)          | C1A–C2A | 1.497(8)          |
| N1–C3   | 1.433(3)          | C2B–C1B | 1.487(7)          |

**Table S2.** All bond angles for **TMZ-LEN·MeOH**.

| angle       | bond angle (°) | angle       | bond angle (°) |
|-------------|----------------|-------------|----------------|
| C18–O4–C21  | 117.84(17)     | O5–C22–N5   | 123.8(2)       |
| C13–O2–C10  | 116.19(16)     | O5–C22–C23  | 120.69(19)     |
| C24–N7–C26  | 122.35(17)     | N5–C22–C23  | 115.5(2)       |
| C25–N7–C24  | 107.21(16)     | C13–C11–H11 | 120.9          |
| C25–N7–C26  | 130.44(18)     | C13–C11–C12 | 118.1(2)       |
| N9–N8–C24   | 118.98(18)     | C12–C11–H11 | 120.9          |
| N9–N10–C27  | 112.84(18)     | C9–C10–O2   | 117.7(2)       |
| C26–N10–N9  | 127.08(17)     | C8–C10–O2   | 120.68(19)     |
| C26–N10–C27 | 120.06(19)     | C8–C10–C9   | 121.6(2)       |
| C5–N2–H2    | 117.4          | N3–C12–C11  | 126.01(19)     |
| C4–N2–H2    | 117.4          | N3–C12–H12  | 117.0          |
| C4–N2–C5    | 125.12(18)     | C11–C12–H12 | 117.0          |

|             |            |               |          |
|-------------|------------|---------------|----------|
| C12-N3-C15  | 116.13(18) | C5-C6-H6      | 119.2    |
| C25-N6-C23  | 107.01(17) | C8-C6-C5      | 121.5(2) |
| C28-O7-H7   | 109.5      | C8-C6-H6      | 119.2    |
| N8-N9-N10   | 119.80(17) | C10-C8-C6     | 119.5(2) |
| C4-N1-H1    | 119.2      | C10-C8-H8     | 120.3    |
| C4-N1-C3    | 121.7(2)   | C6-C8-H8      | 120.3    |
| C3-N1-H1    | 119.2      | N10-C27-H27A  | 109.5    |
| H5A-N5-H5B  | 120.0      | N10-C27-H27B  | 109.5    |
| C22-N5-H5A  | 120.0      | N10-C27-H27C  | 109.5    |
| C22-N5-H5B  | 120.0      | H27A-C27-H27B | 109.5    |
| H4A-N4-H4B  | 120.0      | H27A-C27-H27C | 109.5    |
| C20-N4-H4A  | 120.0      | H27B-C27-H27C | 109.5    |
| C20-N4-H4B  | 120.0      | O4-C21-H21A   | 109.5    |
| N3-C15-C14  | 123.10(19) | O4-C21-H21B   | 109.5    |
| N3-C15-C16  | 118.19(18) | O4-C21-H21C   | 109.5    |
| C16-C15-C14 | 118.71(18) | H21A-C21-H21B | 109.5    |
| C15-C14-C13 | 117.56(18) | H21A-C21-H21C | 109.5    |
| C17-C14-C15 | 119.01(18) | H21B-C21-H21C | 109.5    |
| C17-C14-C13 | 123.42(18) | N1-C3-H3A     | 116.1    |
| C7-C5-N2    | 120.38(18) | N1-C3-H3B     | 115.1    |
| C7-C5-C6    | 117.1(2)   | N1-C3-C1A     | 118.4(5) |
| C6-C5-N2    | 122.5(2)   | N1-C3-C2A     | 118.4(5) |
| C14-C17-H17 | 118.8      | N1-C3-C2B     | 122.7(4) |
| C19-C17-C14 | 122.32(18) | N1-C3-C1B     | 117.6(3) |
| C19-C17-H17 | 118.8      | C1A-C3-H3A    | 116.1    |
| C17-C19-C18 | 118.00(18) | C2A-C3-H3A    | 116.1    |
| C17-C19-C20 | 115.55(17) | C2A-C3-C1A    | 60.3(4)  |
| C18-C19-C20 | 126.45(18) | C2B-C3-H3B    | 115.1    |
| N8-C24-N7   | 120.95(17) | C2B-C3-C1B    | 60.0(3)  |
| N8-C24-C23  | 133.49(19) | C1B-C3-H3B    | 115.1    |
| C23-C24-N7  | 105.54(17) | O7-C28-H28A   | 109.5    |
| O4-C18-C19  | 116.52(18) | O7-C28-H28B   | 109.5    |
| O4-C18-C16  | 122.77(18) | O7-C28-H28C   | 109.5    |
| C16-C18-C19 | 120.71(18) | H28A-C28-H28B | 109.5    |
| O2-C13-C14  | 115.79(17) | H28A-C28-H28C | 109.5    |
| O2-C13-C11  | 125.15(19) | H28B-C28-H28C | 109.5    |
| C11-C13-C14 | 119.05(19) | C3-C1A-H1A    | 117.8    |
| O3-C20-N4   | 121.27(19) | C3-C1A-H1B    | 117.8    |
| O3-C20-C19  | 119.49(18) | C3-C1A-C2A    | 59.8(4)  |
| N4-C20-C19  | 119.24(18) | H1A-C1A-H1B   | 114.9    |
| C15-C16-H16 | 119.4      | C2A-C1A-H1A   | 117.8    |
| C18-C16-C15 | 121.24(18) | C2A-C1A-H1B   | 117.8    |
| C18-C16-H16 | 119.4      | C3-C2A-C1A    | 59.9(4)  |
| N6-C23-C22  | 122.49(18) | C3-C2A-H2A    | 117.8    |

|             |            |                   |         |
|-------------|------------|-------------------|---------|
| C24–C23–N6  | 109.41(18) | C3–C2A–H2B        | 117.8   |
| C24–C23–C22 | 128.08(19) | C1A–C2A–H2A       | 117.8   |
| C5–C7–C11   | 119.90(16) | C1A–C2A–H2B       | 117.8   |
| C5–C7–C9    | 122.63(19) | H2A–C2A–H2B       | 114.9   |
| C9–C7–C11   | 117.48(17) | C3–C2B–H2AA       | 117.8   |
| O6–C26–N7   | 123.4(2)   | C3–C2B–H2AB       | 117.8   |
| O6–C26–N10  | 125.8(2)   | C3–C2B–C1B        | 60.1(3) |
| N10–C26–N7  | 110.76(17) | H2AA–C2B–H2A<br>B | 114.9   |
| O1–C4–N2    | 122.9(2)   | C1B–C2B–H2AA      | 117.8   |
| O1–C4–N1    | 122.9(2)   | C1B–C2B–H2AB      | 117.8   |
| N1–C4–N2    | 114.22(19) | C3–C1B–H1AA       | 117.8   |
| C7–C9–H9    | 121.2      | C3–C1B–H1AB       | 117.8   |
| C10–C9–C7   | 117.6(2)   | C2B–C1B–C3        | 59.9(3) |
| C10–C9–H9   | 121.2      | C2B–C1B–H1AA      | 117.8   |
| N7–C25–H25  | 124.6      | C2B–C1B–H1AB      | 117.8   |
| N6–C25–N7   | 110.83(18) | H1AA–C1B–H1A<br>B | 114.9   |
| N6–C25–H25  | 124.6      |                   |         |

**Table S3** The percentage contributions to the Hirshfeld surface area of various intermolecular contacts of **TMZ-LEN·MeOH**.

| intermolecular contact | contribution (%) |
|------------------------|------------------|
| H–H                    | 41.1             |
| O–H                    | 19.6             |
| C–H                    | 10.7             |
| N–H                    | 9.0              |
| Cl–H                   | 7.2              |
| C–N                    | 5.1              |
| C–C                    | 3.3              |
| C–O                    | 1.6              |
| other                  | 2.4              |

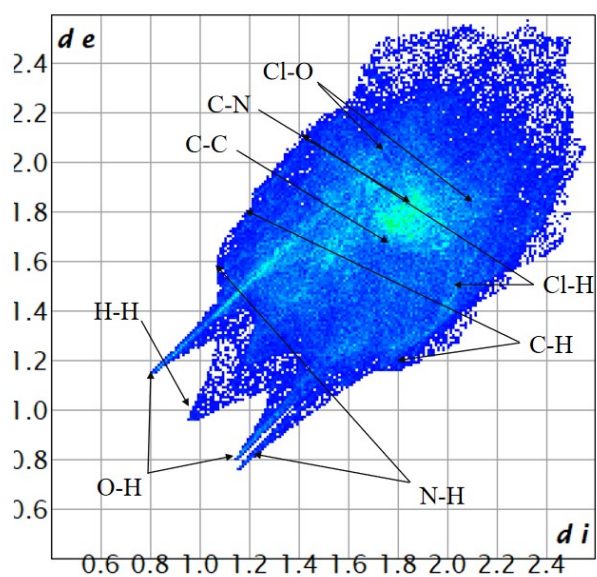

**Fig. S1** The 2D fingerprint plots of TMZ-LEN·MeOH

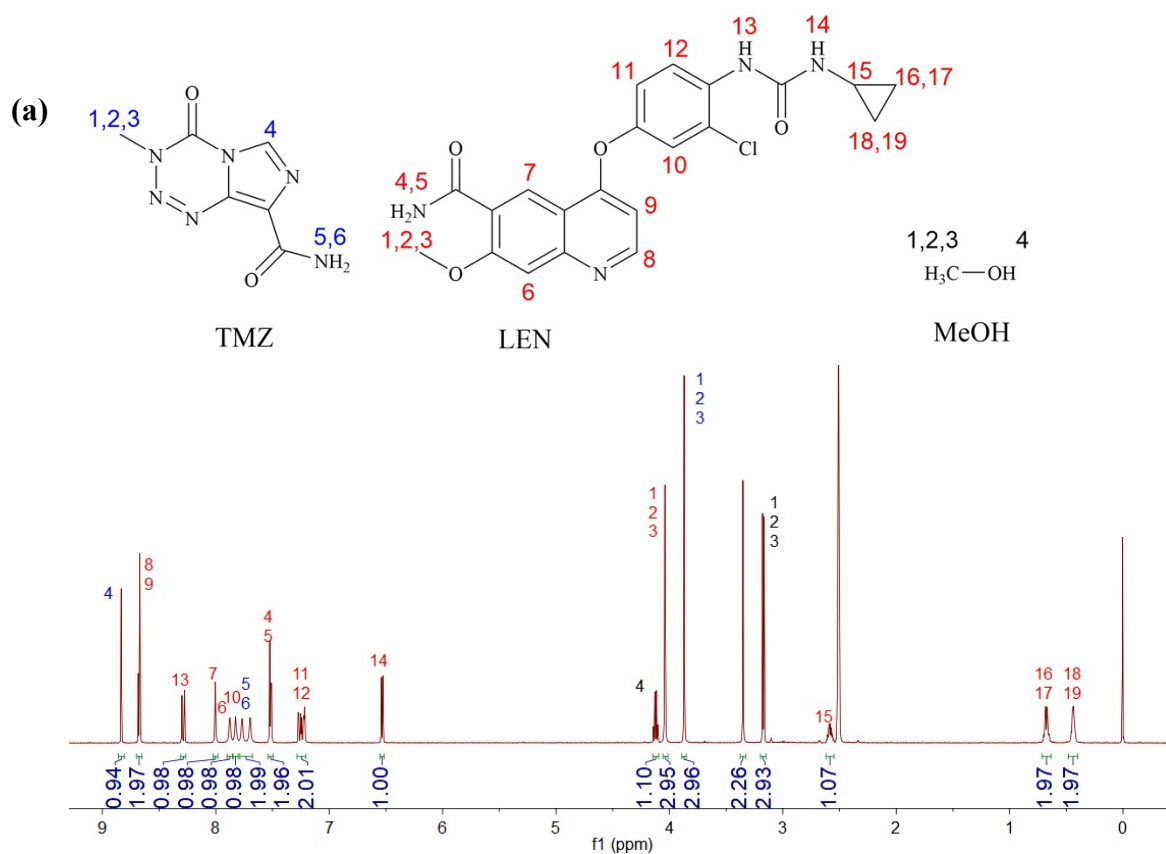

(b)

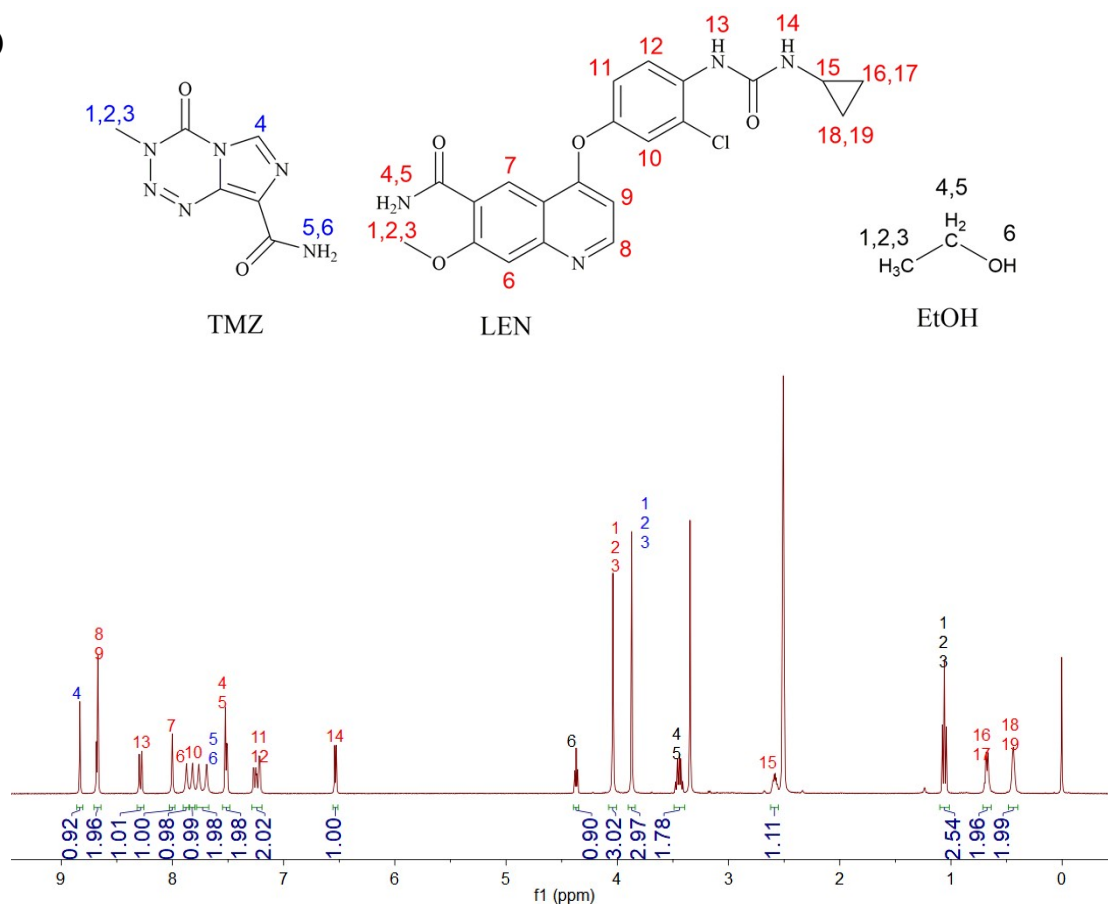

Fig. S2 <sup>1</sup>H NMR spectra of (a) TMZ-LEN·MeOH and (b) TMZ-LEN·EtOH

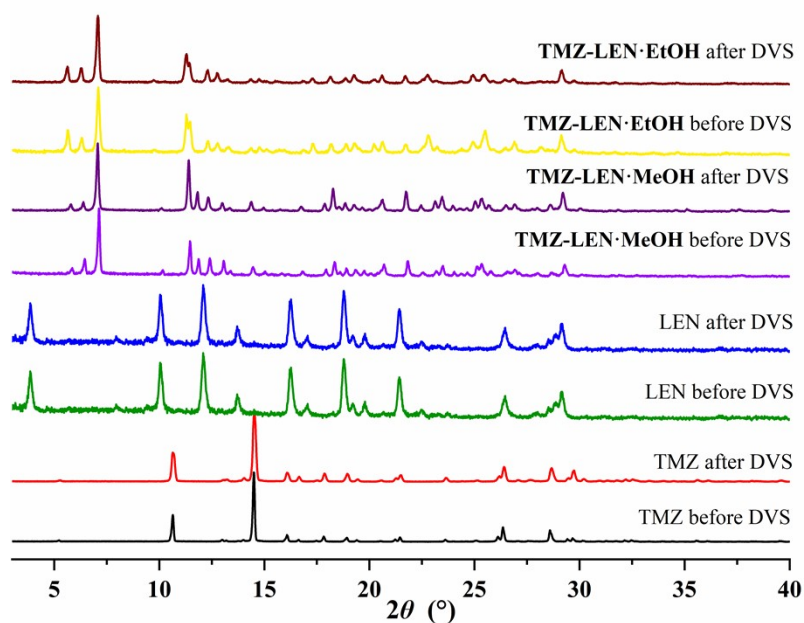

Fig. S3 PXRD patterns of TMZ, LEN, TMZ-LEN·MeOH and TMZ-LEN·EtOH before and after DVS experiment.

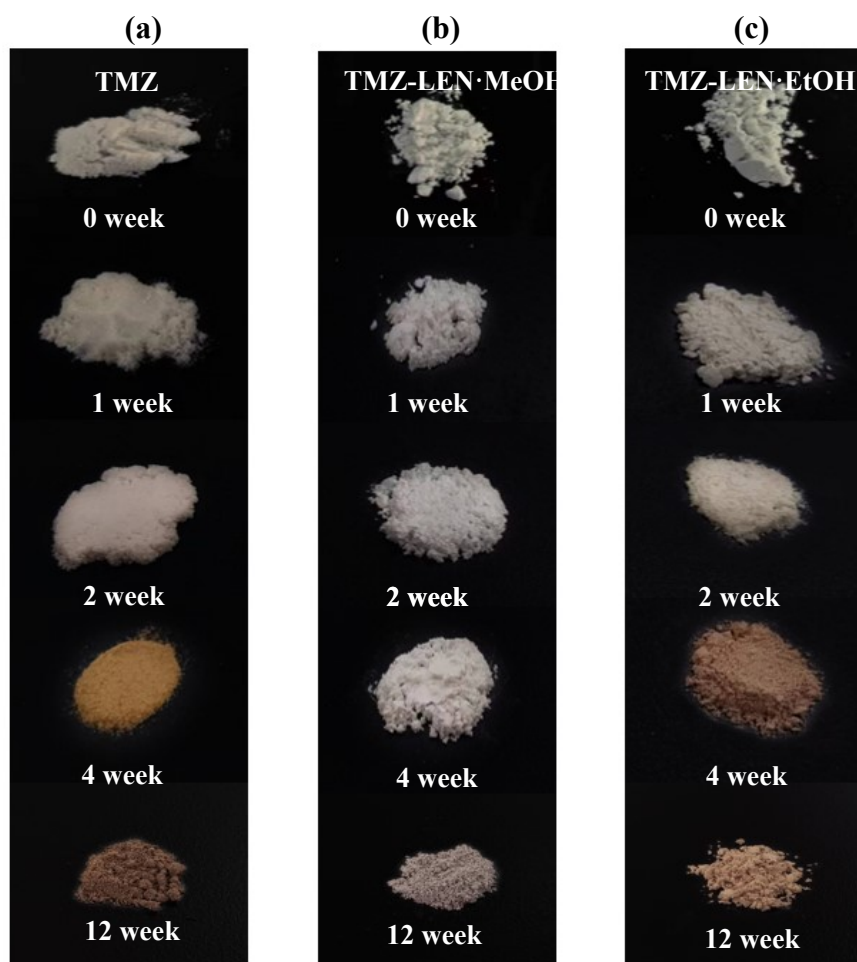

**Fig. S4** Color comparison of pure (a) TMZ, (b) TMZ-LEN·MeOH and (c) TMZ-LEN·EtOH under 40 °C/75% RH.

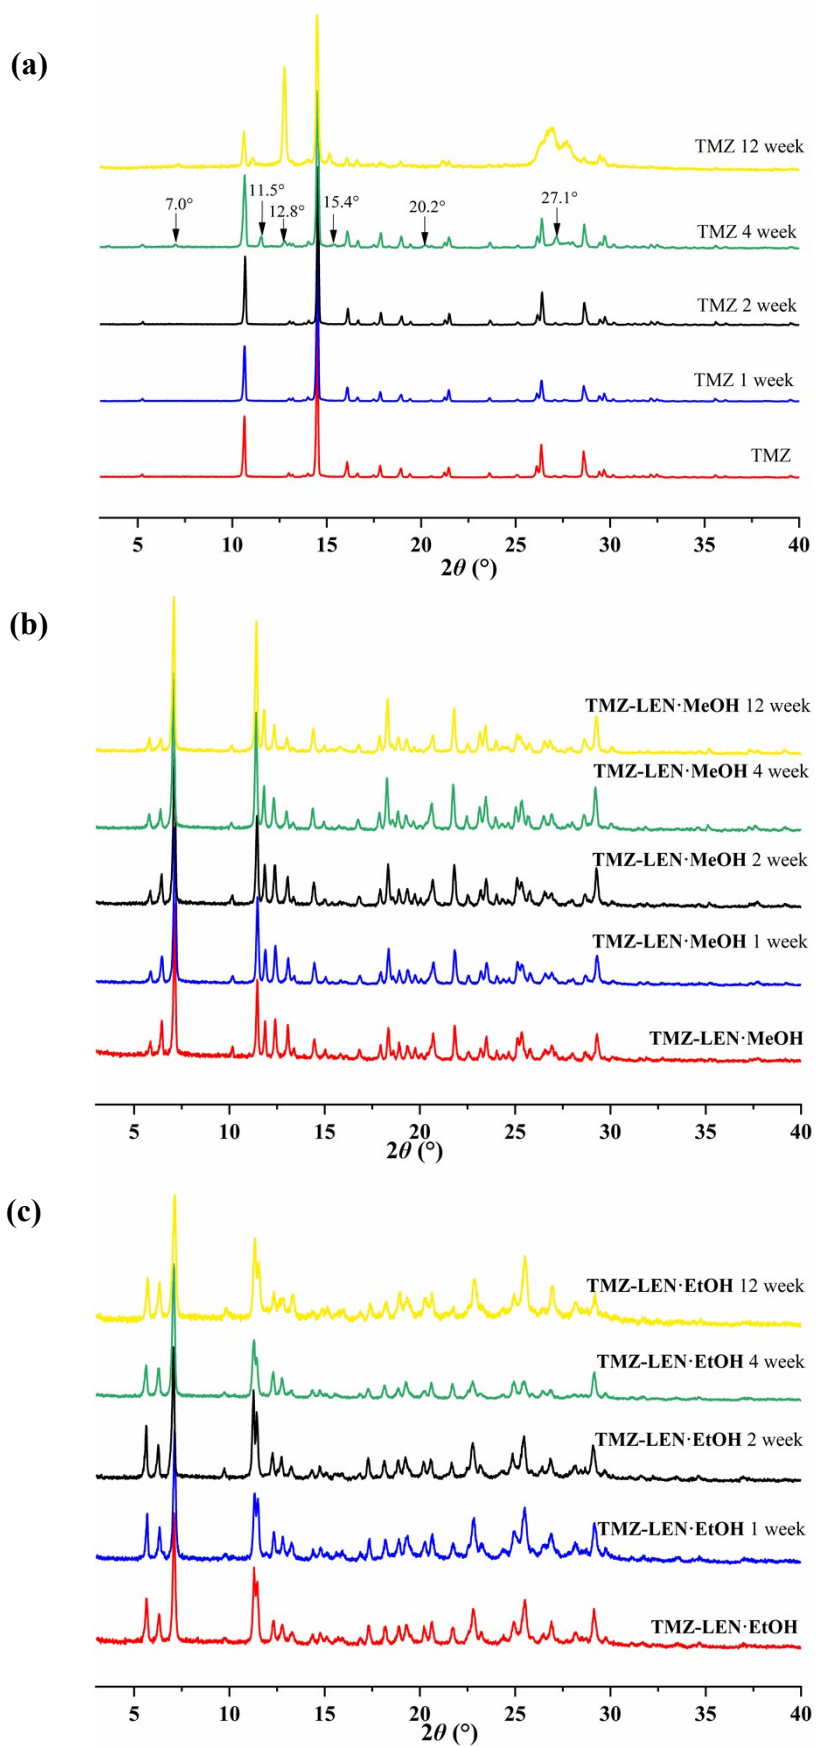

**Fig. S5** PXRD patterns of (a) TMZ, (b) TMZ-LEN·MeOH and (c) TMZ-LEN·EtOH under 40 °C/75% RH.



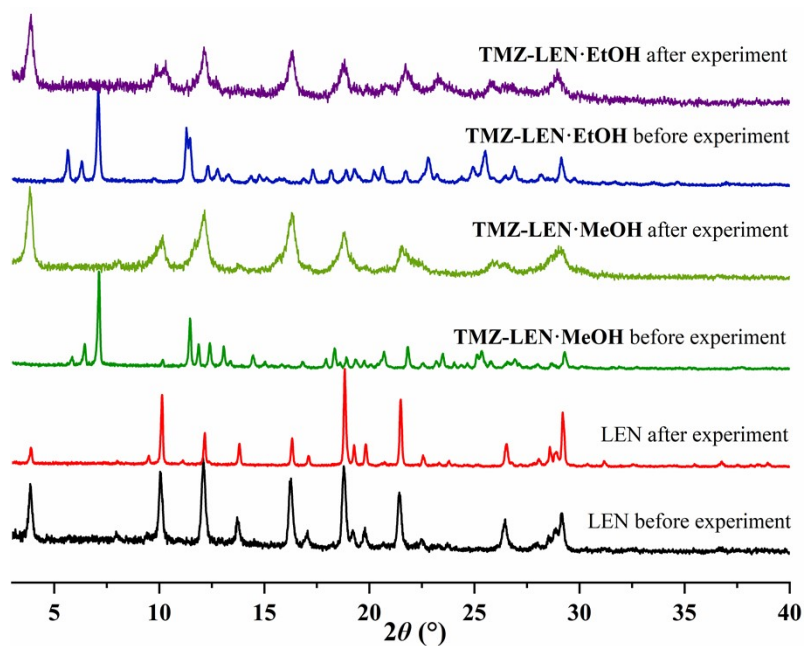

**Fig. S6** PXR D patterns of **TMZ-LEN·MeOH** and **TMZ-LEN·EtOH** before and after dissolution experiment.

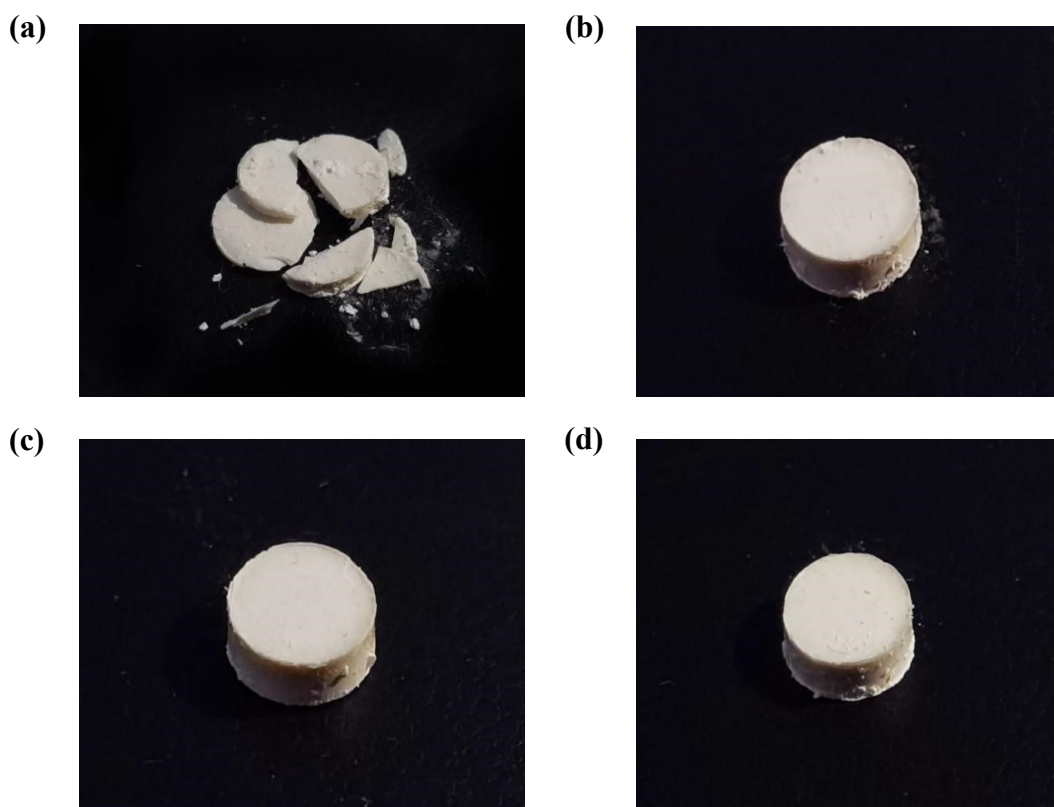

**Fig. S7** Photographs of (a) **TMZ**, (b) **LEN**, (c) **TMZ-LEN·MeOH** and (d) **TMZ-LEN·EtOH** tablets under a compaction pressure of 350 MPa.

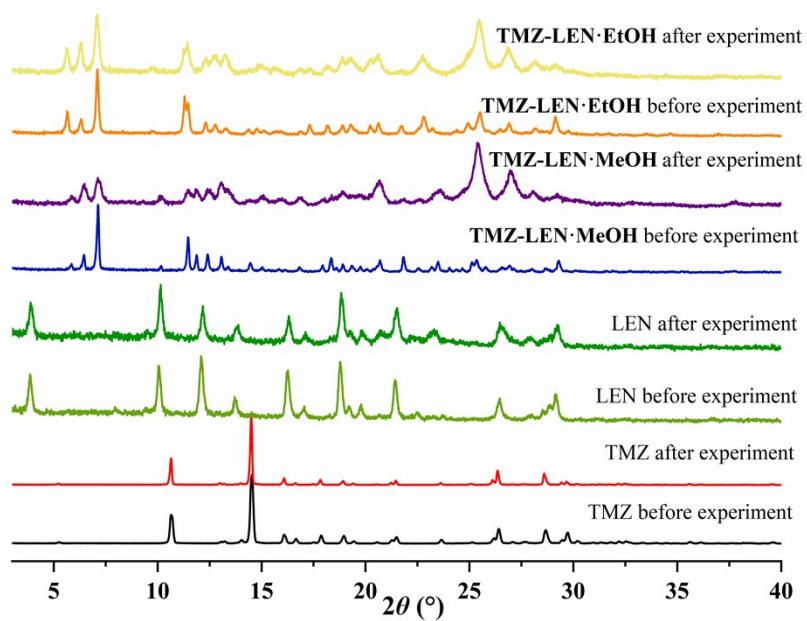

**Fig. S8** PXRD patterns of TMZ, LEN, TMZ-LEN·MeOH and TMZ-LEN·EtOH before and after compaction experiment at 350 MPa.
